# Supplementary material
Source: Springer Nature journal article supplement (https://www.springermedizin.de/resource/supplementary/12877_2012_757_MOESM3_ESM.pdf/9440290)
Supplement: MOESM3 [file 9440290]

# Timeline flow and activities

2000 2001 2002 2003 2004 2005 2006 2007 2008 2009 2010

**Intervention for GPs:**

Geriatric quality circle (QC) for general practitioners (GP) bi-monthly

**Intervention for senior citizens:**

Self-administered written questionnaire  
 - baseline (recruitment)  
 - wave 1 (2001 – 2002)  
 - wave 2 (2007 – 2008)  
 - wave 3 (2009 – 2010)

**Embedded RCT interventions**

2001-2002 offer to intervention group only:  
 Small group sessions carried out by interdisciplinary health educator team or preventive/geriatric home visit carried out by specially trained nurse

2003-2006 offer to control group also:  
 Small group sessions carried out by interdisciplinary health educator team

2008-2010 division of all participants according to their functional status (wave 2) into subgroups FIT or pre-FRIL or FRIL: Assessment offer to randomised persons in these subgroups;  
 All participants with displacement after WW II and matched control group without displacement (subgroup FORCED): Assessment offer

Interim calls and telephone hotline: all participants e.g. to evaluate primary outcomes such as date of death, nursing care and degree, nursing home admission

Double check of participant / proxy information about primary outcomes (death, nursing care) with Central Registries of Medical Review Board North of the Statutory Health Insurance (MDK-N) and Hamburg's Central Inhabitant Registry (HCIR)

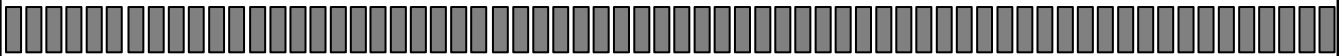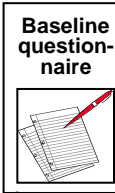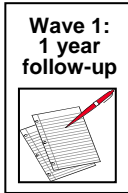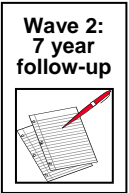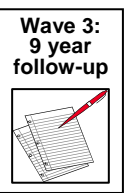

**RCT intervention group**

**RCT control group (intervention after RCT)**

**Grading into LUCAS subgroups**

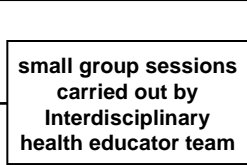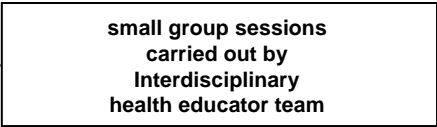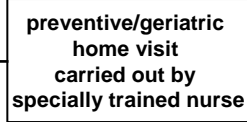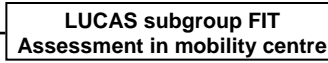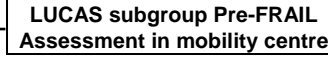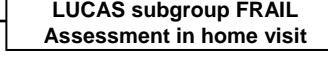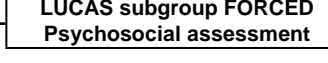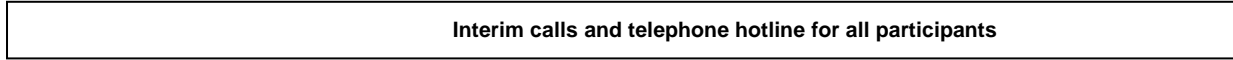

central registry MDK-N

central registry HCIR
